# Supplementary material for: Novel Adiposity and Biochemical–Anthropometric Indices to Identify Cardiometabolic Risk and Metabolic Syndrome in Mexican Adults
Source: MDPI journal article supplement (doi:10.3390/healthcare9111561), 2021-11-16
Supplement: s1 [file s1]

**Table S1.** Comparison of anthropometric, body composition, clinical and biochemical characteristics stratified by sex and MetS diagnosis.

| Variable                          | Men<br>n = 763      |                 |          | Women<br>n = 141   |                |          |
|-----------------------------------|---------------------|-----------------|----------|--------------------|----------------|----------|
|                                   | Non-MetS<br>n = 353 | MetS<br>n = 410 | <i>p</i> | Non-MetS<br>n = 88 | MetS<br>n = 53 | <i>p</i> |
| Age (years)                       | 32.0 ± 7.8          | 34.7 ± 8.3      | < 0.001  | 31.8 ± 7.0         | 36.2 ± 7.4     | 0.001    |
| BMI (kg/m <sup>2</sup> )          | 25.9 ± 3.2          | 29.8 ± 3.5      | < 0.001  | 25.4 ± 4.0         | 30.8 ± 4.6     | < 0.001  |
| WHtR                              | 0.5 ± 0.1           | 0.6 ± 0.1       | < 0.001  | 0.5 ± 0.1          | 0.6 ± 0.1      | < 0.001  |
| WC (cm)                           | 89.8 ± 8.1          | 100.5 ± 8.9     | < 0.001  | 87.0 ± 10.7        | 97.0 ± 8.8     | < 0.001  |
| VFA (cm <sup>2</sup> )            | 86.9 ± 30.3         | 120.1 ± 29.7    | < 0.001  | 98.4 ± 34.2        | 135.1 ± 33.0   | < 0.001  |
| Total body fat (kg)               | 17.9 ± 6.6          | 25.9 ± 7.4      | < 0.001  | 21.5 ± 8.1         | 30.5 ± 8.4     | < 0.001  |
| Body fat percentage (%)           | 23.4 ± 6.4          | 29.5 ± 5.7      | < 0.001  | 32.2 ± 7.1         | 39.0 ± 6.1     | < 0.001  |
| Free fat mass (kg)                | 57.4 ± 6.5          | 60.8 ± 7.2      | < 0.001  | 43.4 ± 4.4         | 46.5 ± 5.1     | < 0.001  |
| Skeletal muscle mass (kg)         | 32.6 ± 4.0          | 34.6 ± 4.3      | < 0.001  | 23.9 ± 2.7         | 25.9 ± 3.1     | < 0.001  |
| Systolic BP (mmHg)                | 119.5 ± 11.9        | 129.3 ± 13.8    | < 0.001  | 113.6 ± 10.0       | 122.0 ± 14.0   | < 0.001  |
| Diastolic BP (mmHg)               | 73.9 ± 8.9          | 81.6 ± 10.1     | < 0.001  | 73.1 ± 8.7         | 80.4 ± 10.9    | < 0.001  |
| MBP (mmHg)                        | 89.1 ± 8.6          | 97.5 ± 10.1     | < 0.001  | 86.6 ± 8.1         | 94.2 ± 10.8    | < 0.001  |
| FBG (mg/dL)                       | 90.0 ± 10.6         | 99.8 ± 12.4     | < 0.001  | 89.4 ± 10.2        | 98.3 ± 13.1    | < 0.001  |
| Total cholesterol (mg/dL)         | 177.8 ± 35.4        | 190.9 ± 33.4    | < 0.001  | 168.1 ± 26.3       | 192.0 ± 32.7   | < 0.001  |
| HDL-C (mg/dL)                     | 39.4 ± 8.5          | 33.1 ± 6.6      | < 0.001  | 43.9 ± 10.5        | 38.6 ± 6.6     | < 0.001  |
| LDL-C (mg/dL)                     | 111.4 ± 29.6        | 113.3 ± 31.4    | < 0.001  | 105.1 ± 22.8       | 118.3 ± 30.1   | 0.008    |
| VLDL-C (mg/dL)                    | 27.0 ± 13.7         | 44.8 ± 18.7     | < 0.001  | 17.0 (10.3)        | 30.0 (17.8)    | < 0.001  |
| TG (mg/dL)                        | 135.0 ± 68.4        | 224.1 ± 93.3    | < 0.001  | 86.5 (53.0)        | 150.0 (91.0)   | < 0.001  |
| VAI                               | 1.8 (1.2)           | 3.8 (2.4)       | < 0.001  | 2.0 ± 1.1          | 4.0 ± 2.3      | < 0.001  |
| LAP                               | 38.9 ± 23.8         | 89.2 ± 43.3     | < 0.001  | 28.1 (24.3)        | 68.8 (40.0)    | < 0.001  |
| NVAI                              | 0.7 (0.5)           | 1.0 (0.1)       | < 0.001  | 0.5 ± 0.3          | 0.8 ± 0.2      | < 0.001  |
| METS-VF                           | 6.5 ± 0.5           | 7.0 ± 0.4       | < 0.001  | 6.2 ± 0.6          | 6.8 ± 0.3      | < 0.001  |
| TyG                               | 8.6 ± 0.5           | 9.2 ± 0.4       | < 0.001  | 8.3 ± 0.4          | 8.9 ± 0.5      | < 0.001  |
| TyG-BMI                           | 223.2 ± 31.3        | 274.4 ± 34.1    | < 0.001  | 210.5 ± 36.2       | 274.9 ± 42.5   | < 0.001  |
| TyG-WC                            | 773.3 ± 87.3        | 927.0 ± 90.5    | < 0.001  | 713.8 ± 102.4      | 866.6 ± 86.9   | < 0.001  |
| METS-IR                           | 40.9 ± 6.2          | 51.7 ± 7.2      | < 0.001  | 38.1 ± 6.9         | 49.8 ± 7.8     | < 0.001  |
| MetS components, N (%)            |                     |                 |          |                    |                |          |
| Elevated WC                       | 95 (26.9)           | 332 (81.0)      | < 0.001  | 33 (37.5)          | 46 (86.8)      | < 0.001  |
| Elevated BP                       | 65 (18.4)           | 256 (62.4)      | < 0.001  | 8 (9.1)            | 28 (52.8)      | < 0.001  |
| Reduced HDL-C level               | 172 (48.7)          | 367 (89.5)      | < 0.001  | 65 (73.9)          | 51 (96.2)      | 0.001    |
| Elevated FBG level                | 44 (12.5)           | 230 (56.1)      | < 0.001  | 10 (11.4)          | 26 (49.1)      | < 0.001  |
| Elevated TG level                 | 97 (27.5)           | 332 (81.0)      | < 0.001  | 6 (6.8)            | 27 (50.9)      | < 0.001  |
| VFA ≥ 100 cm <sup>2</sup> , N (%) | 107 (30.3)          | 315 (76.8)      | < 0.001  | 41 (46.6)          | 42 (79.2)      | < 0.001  |

Data are presented as mean ± standard deviation or median and interquartile range. Comparisons were determined by t-student for independent samples or U-Mann-Whitney. Categorical variables are presented as count (percentage) and comparisons were determined by  $\chi^2$  test or Fischer's exact test. A *p*-value ≤ 0.05 was taken as statistically significant. Abbreviations: MetS: Metabolic syndrome, BMI: Body mass index, WHtR: Waist to height ratio, WC: Waist circumference, VFA: Visceral fat area, BP: Blood pressure, MBP: Mean blood pressure, FBG: Fasting blood glucose, HDL-C: High-density lipoprotein cholesterol, LDL-C: Low-density lipoprotein cholesterol, VLDL-C: Very-low-density lipoprotein cholesterol, TG: Triglycerides, VAI: Visceral adiposity index, LAP: Lipid accumulation product, NVAI: New visceral adiposity index, METS-VF: Metabolic score for visceral fat, TyG: Triglycerides-glucose index, TyG-BMI: Triglycerides-glucose Body mass index, TyG-WC: Triglycerides-glucose Waist circumference index and METS-IR: Metabolic score for insulin resistance.

**Table S2.** Comparison of anthropometric, body composition and biochemical characteristics in secondary cohort stratified by MetS diagnosis.

| Variable                             | Non-MetS<br>n = 73 | MetS<br>n = 113 | <i>p</i> |
|--------------------------------------|--------------------|-----------------|----------|
| Age (years)                          | 38.0 ± 10.7        | 40.3 ± 10.4     | 0.160    |
| Male (%)                             | 34 (46.6)          | 72 (63.7)       | 0.021    |
| BMI (kg/m <sup>2</sup> )             | 25.7 ± 4.2         | 30.6 ± 4.4      | < 0.001  |
| WC (cm)                              | 87.6 ± 11.4        | 101.8 ± 11.2    | < 0.001  |
| Visceral fat area (cm <sup>2</sup> ) | 89.7 ± 45.6        | 137.5 ± 50.9    | < 0.001  |
| Total body fat (kg)                  | 20.8 ± 8.3         | 30.4 ± 9.1      | < 0.001  |
| Body fat percentage (%)              | 30.2 ± 8.6         | 35.7 ± 7.4      | < 0.001  |
| Free fat mass (kg)                   | 47.3 ± 9.1         | 54.3 ± 10.2     | < 0.001  |
| Skeletal muscle mass (kg)            | 26.4 ± 5.6         | 30.6 ± 6.1      | < 0.001  |
| Systolic BP (mmHg)                   | 115.8 ± 11.3       | 126.3 ± 15.2    | < 0.001  |
| Diastolic BP (mmHg)                  | 71.3 ± 9.1         | 78.8 ± 9.0      | < 0.001  |
| MBP (mmHg)                           | 86.1 ± 8.7         | 94.6 ± 10.3     | < 0.001  |
| FBG (mg/dL)                          | 94.0 (13.0)        | 108.0 (12.0)    | < 0.001  |
| HDL-C (mg/dL)                        | 49.6 ± 12.0        | 37.5 ± 8.3      | < 0.001  |
| TG (mg/dL)                           | 101.0 (61.0)       | 173.0 (115.0)   | < 0.001  |
| BAI1                                 | 0.1 (0.3)          | 0.9 (0.3)       | < 0.001  |
| BAI2                                 | 0.1 (0.2)          | 0.9 (0.4)       | < 0.001  |

Data are presented as mean ± standard deviation or median and interquartile range. Comparisons were determined by t-student for independent samples or U-Mann-Whitney. Categorical variables are presented as count (percentage) and comparisons were determined by  $\chi^2$  test or Fischer's exact test. A *p*-value ≤ 0.05 was taken as statistically significant. Abbreviations: MetS: Metabolic syndrome, BMI: Body mass index, WC: Waist circumference, BP: Blood pressure, MBP: Mean blood pressure, FBG: Fasting blood glucose, HDL-C: High-density lipoprotein cholesterol and BAI: Biochemical-anthropometrical index.

**Table S3.** Comparison of MAIs in secondary cohort stratified by sex and MetS diagnosis.

| Variable | Men<br>n = 103 |              |          | Women<br>n = 79 |              |          |
|----------|----------------|--------------|----------|-----------------|--------------|----------|
|          | Non-MetS       | MetS         | <i>p</i> | Non-MetS        | MetS         | <i>p</i> |
|          | n = 32         | n = 71       |          | n = 38          | n = 41       |          |
| MAIm     | 86.4 ± 24.3    | 127.8 ± 35.0 | < 0.001  | -               | -            | -        |
| MAIw     | -              | -            | -        | 102.7 ± 39.3    | 137.3 ± 38.7 | < 0.001  |

Data are presented as mean ± standard deviation. Comparisons were determined by t-student for independent samples. A *p*-value ≤ 0.05 was taken as statistically significant. Abbreviations: MetS: Metabolic syndrome, MAIm: Mexican adiposity index for men and MAIw: Mexican adiposity index for women.

**Table S4.** Sex and Age-specific cut-off values of VFA-BIA to identify CR in Mexican adults.

| Age (years)     | VFA                              |                 |                 |      | <i>p</i> |
|-----------------|----------------------------------|-----------------|-----------------|------|----------|
|                 | Cut-off Value (cm <sup>2</sup> ) | Sensitivity (%) | Specificity (%) | AUC  |          |
| Men (n = 763)   |                                  |                 |                 |      |          |
| 20-40 (n = 618) | 97.0                             | 67.1            | 67.3            | 0.70 | < 0.001  |
| 41-60 (n = 145) | 103.6                            | 76.4            | 69.2            | 0.79 | < 0.001  |
| Women (n = 141) |                                  |                 |                 |      |          |
| 20-40 (n = 112) | 103.7                            | 62.0            | 61.3            | 0.71 | < 0.001  |
| 41-60 (n = 29)  | 115.6                            | 61.1            | 54.5            | 0.58 | 0.500    |

A *p*-value  $\leq 0.05$  was taken as statistically significant. Abbreviations: VFA: visceral fat area and AUC: area under the curve.

**Table S5.** Predictive performance of MAIs, BAIs and indicators of interest to identify CR in Mexican adults.

| Indicator | AUC  | Sensitivity (%) | Specificity (%) | <i>p</i> |
|-----------|------|-----------------|-----------------|----------|
| MAIw      | 0.72 | 65.7            | 64.4            | < 0.001  |
| MAIm      | 0.72 | 65.6            | 65.6            | < 0.001  |
| BAI1      | 0.89 | 80.6            | 80.1            | < 0.001  |
| BAI2      | 0.89 | 82.0            | 81.6            | < 0.001  |
| METS-VF   | 0.74 | 68.5            | 68.1            | < 0.001  |
| WHtR      | 0.71 | 64.2            | 63.8            | < 0.001  |
| WC        | 0.71 | 63.7            | 64.1            | < 0.001  |
| BMI       | 0.71 | 63.8            | 63.8            | < 0.001  |

A *p*-value  $\leq 0.05$  was taken as statistically significant. Abbreviations: AUC: area under the curve, MAIw: Mexican adiposity index for women, MAIm: Mexican adiposity index for men, BAI: Biochemical-anthropometric index, METS-VF: Metabolic score for visceral fat, WHtR: Waist to height ratio, WC: Waist circumference and BMI: Body mass index.

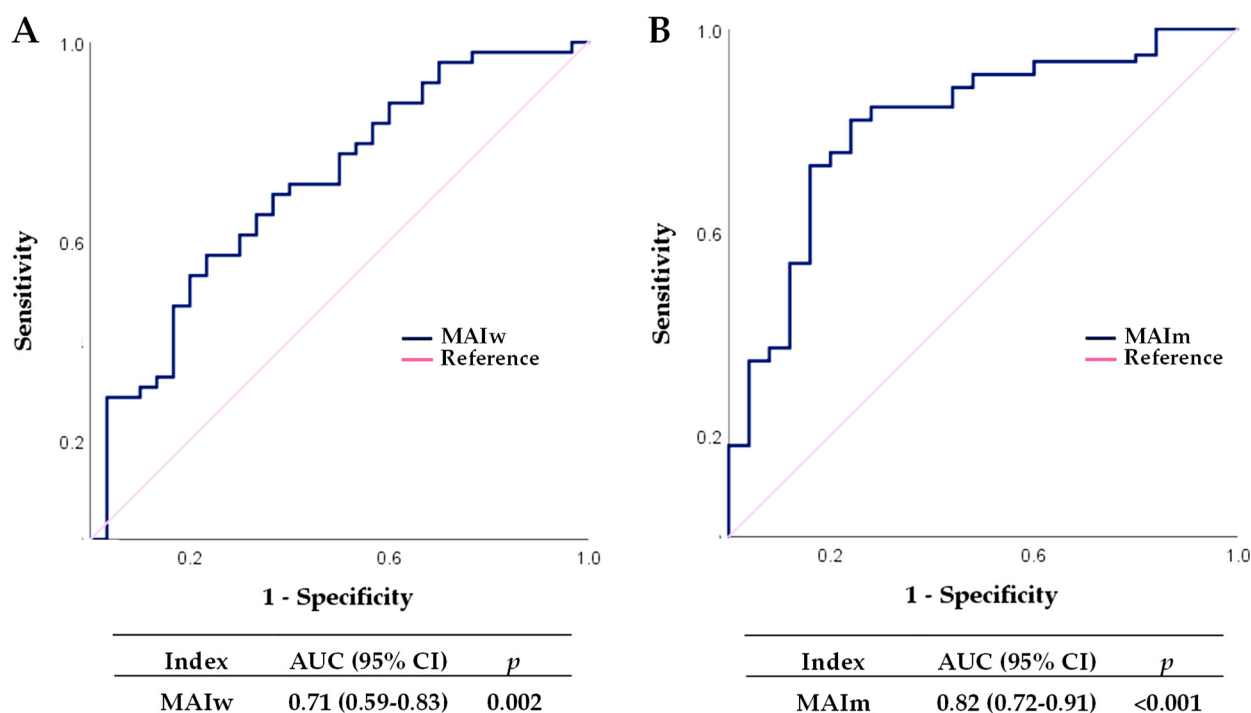

**Figure S1.** ROC curve and AUC of MAIm and MAIw to identify CR associated to VAT accumulation in secondary cohort. (A) MAIm and (B) MAIw ROC curve to identify CR associated with VAT accumulation. A *p*-value  $\leq 0.05$  was taken as

statistically significant. Abbreviations: ROC: Receiver operating characteristic, AUC: Area under the curve, CI: Confidence interval, MAIm: Mexican adiposity index for men and MAIw: Mexican adiposity index for women.

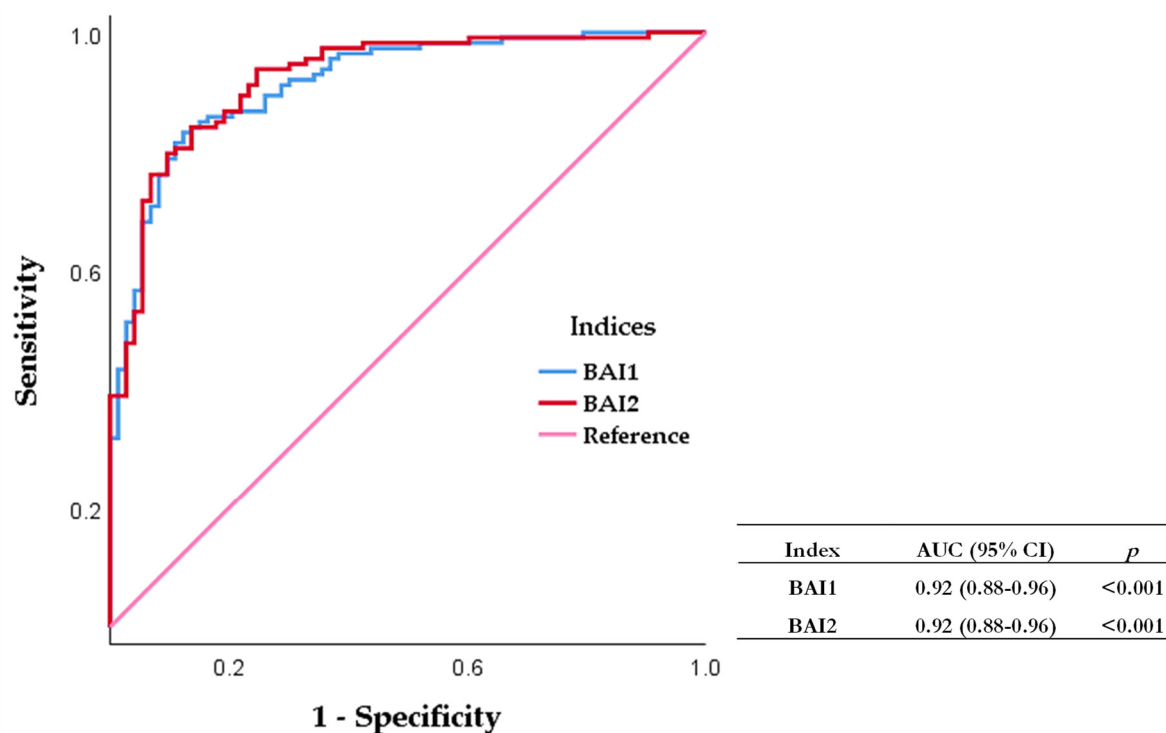

**Figure S2.** ROC curve and AUC comparison of BAI1 and BAI2 to identify MetS in secondary cohort. A *p*-value  $\leq 0.05$  was taken as statistically significant. Abbreviations: ROC: Receiver operating characteristic, AUC: Area under the curve, CI: Confidence interval and BAI: Biochemical-anthropometrical index.

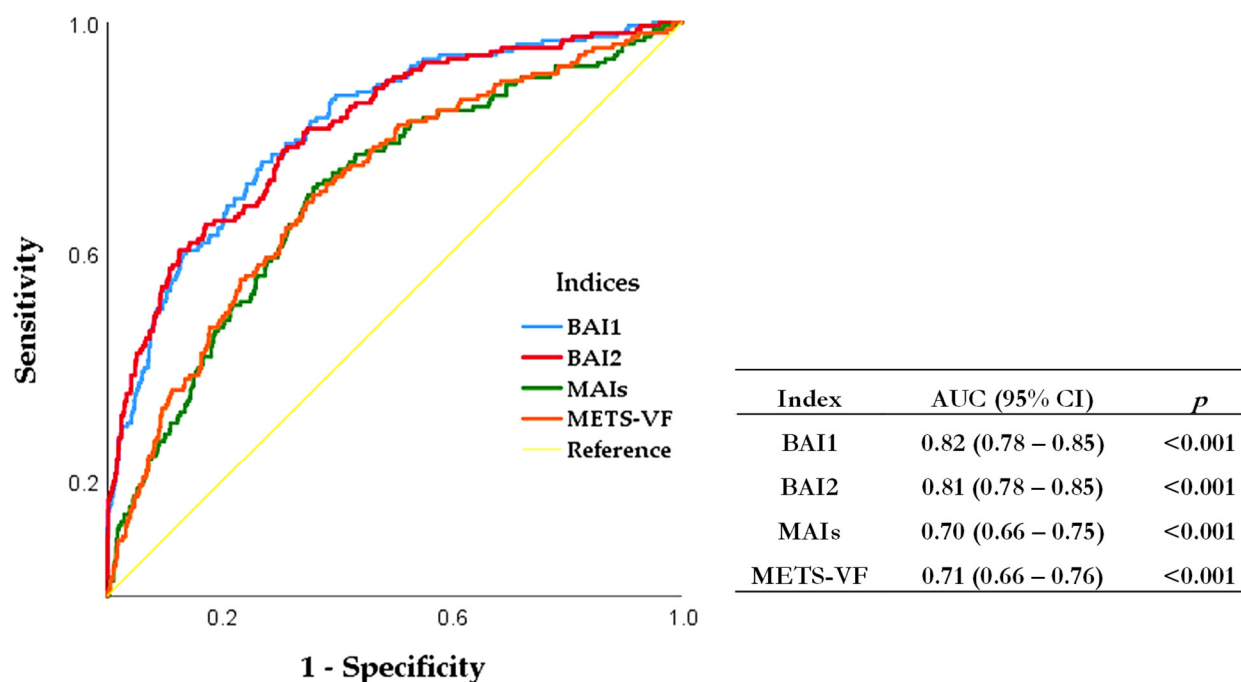

**Figure S3.** ROC curve analysis and AUC comparison of BAIs, MAIs, and METS-VF to identify hypertension in Mexican adults. A *p*-value  $\leq 0.05$  was taken as statistically significant. Abbreviations: ROC: Receiver operating characteristic, AUC: Area under the curve, CI: Confidence interval and BAI: Biochemical-anthropometrical index, MAIs: Mexican adiposity indices and METS-VF: Metabolic score for visceral fat.
